# Supplementary material for: Two-dimensional proton-detected 35Cl/1H correlation solid-state NMR experiment under fast magic angle sample spinning: application to pharmaceutical compounds
Source: Royal Society of Chemistry journal article supplement (doi:10.1039/c5cp06042g), 2016-01-01
Supplement: c5cp06042g1.pdf [file c5cp06042g1.pdf]

### Supporting Information

Two-dimensional proton-detected  $^{35}\text{Cl}/^1\text{H}$  correlation solid-state NMR experiment under fast magic angle sample spinning: Application to pharmaceutical compounds

Manoj Kumar Pandey<sup>1</sup>, Hiroshi Kato<sup>2</sup>, Yuji Ishii<sup>2</sup>, Yusuke Nishiyama<sup>\*1,2</sup>

<sup>1</sup>RIKEN CLST-JEOL collaboration center, RIKEN, Yokohama, Kanagawa 230-0045, Japan

<sup>2</sup> JEOL RESONANCE Inc., Musashino, Akishima, Tokyo 196-8558, Japan

\*Corresponding author

E-mail address: [yunishiy@jeol.co.jp](mailto:yunishiy@jeol.co.jp)

Tel: +81-42-542-2236

Fax: +81-42-544-1955

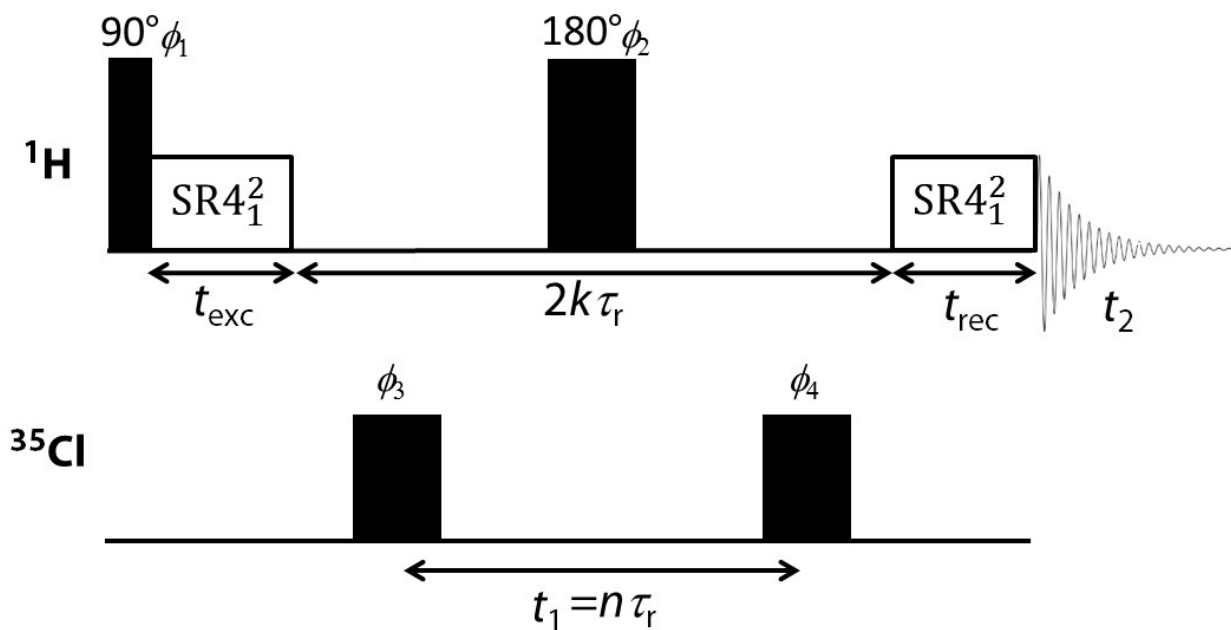

**Figure S1.** Two-dimensional heteronuclear dipolar coupling based D-HMQC pulse sequence to accomplish  $^{35}\text{Cl}/^1\text{H}$  correlations in the present study. Rotor-synchronized heteronuclear dipolar recoupling sequence  $\text{SR}4_1^2$  is applied during the excitation and reconversion periods. To maximize the formation of rotational echoes, the time intervals between  $\text{SR}4_1^2$  and  $180^\circ$  pulse on  $^1\text{H}$  channel are rotor-synchronized. The phase cycling scheme used for the pulse sequence shown is as follows:  $\phi_1 = \{2(0), 2(180), 2(90), 2(270)\}$ ,  $\phi_2 = \{0\}$ ,  $\phi_3 = \{0, 180\}$ ,  $\phi_4 = \{0\}$ ,  $\phi_{\text{aqc}} = \{0, 180, 180, 0, 270, 90, 90, 270\}$ .

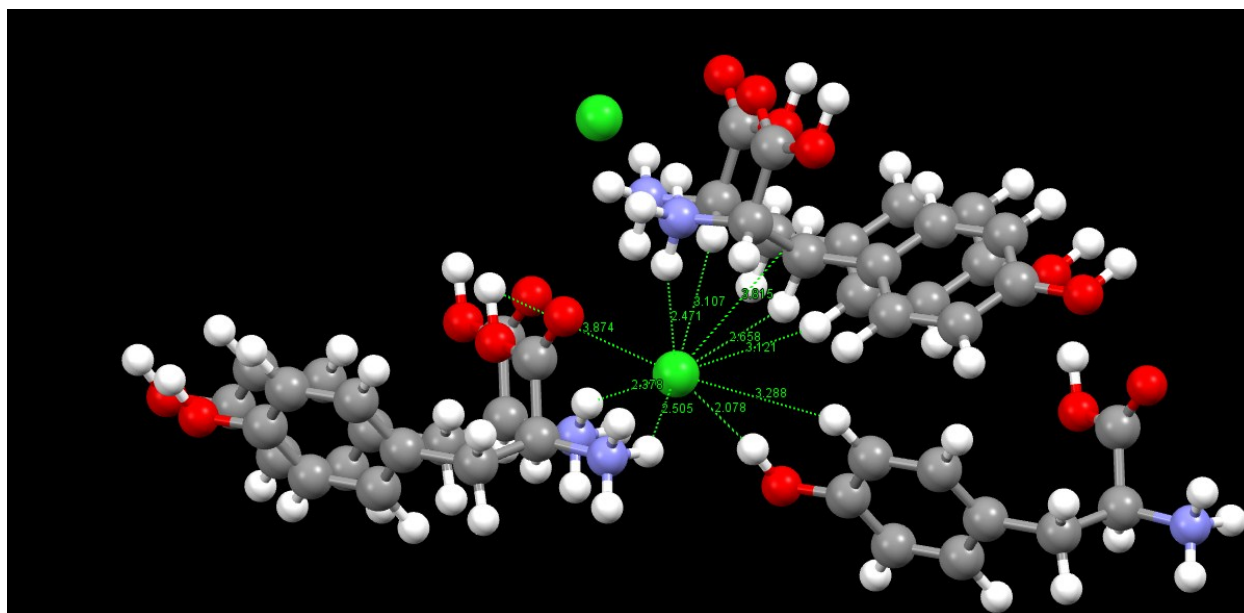

**Figure S2.**  $^{35}\text{Cl}$  (green sphere) to  $^1\text{H}$  (white sphere) distances from the crystal structure of L-Tyrosine.HCl. All distances shorter than 3.784 Å are shown.

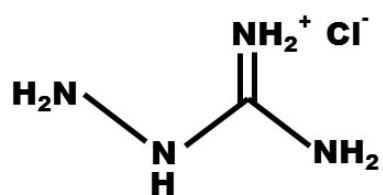

Aminoguanidine HCl (Amin)

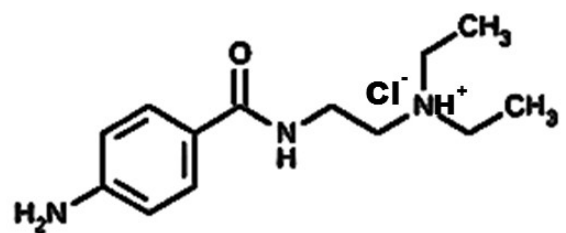

Procainamide HCl (Proc)

**Figure S3.** Molecular structures of Amonoguanidine HCl (Amin) and Procainamide HCl (Proc).

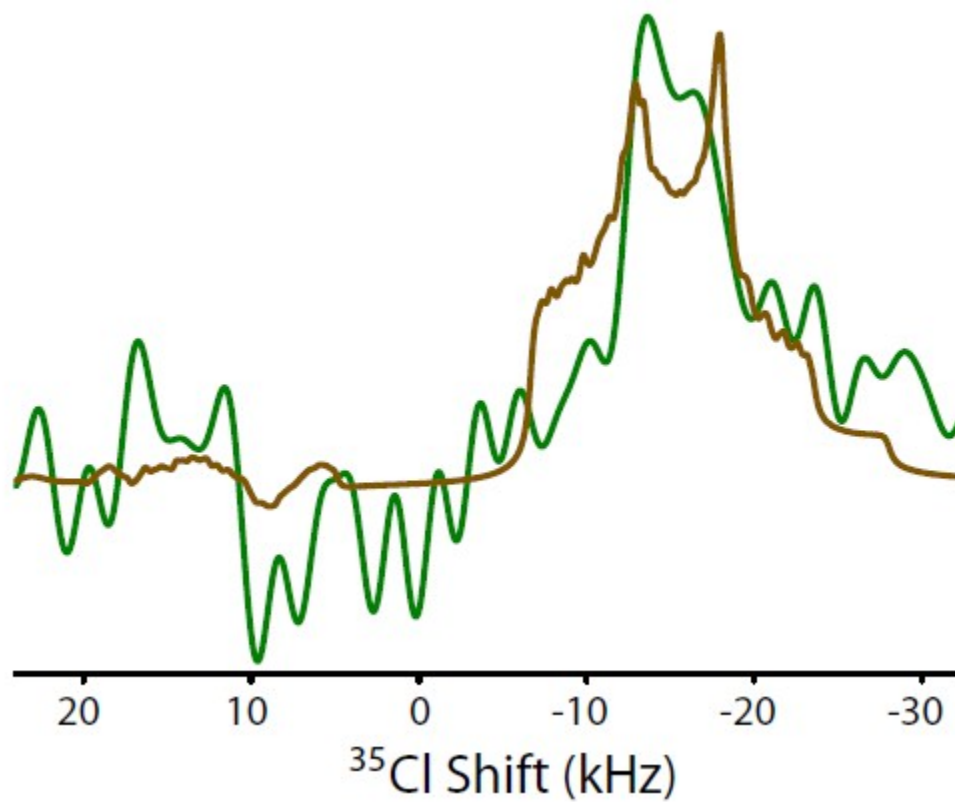

**Figure S4.**  $^{35}\text{Cl}$  experimental lineshape (green) extracted parallel to the indirect frequency dimension of the 2D  $^{35}\text{Cl}/^1\text{H}$  correlation spectrum at 10.4 ppm  $^1\text{H}$  chemical shift of Amin and the corresponding simulated lineshape (brown).
